# Supplementary material for: Genomic Insights Into the Genetic Structure and Natural Selection of Mongolians
Source: Front Genet. 2021 Dec 8;12:735786. doi: 10.3389/fgene.2021.735786 (PMC8693022; doi:10.3389/fgene.2021.735786)
Supplement: Supplementary file 2 [file Table14.xlsx]

## Sheet: Derived allele frequencey
Table S15. The derived mutation frequency of functional genes in Mongolian. Adjusted R2 and p-value were estimated by regression analysis(the frequency vs fst(X and CHB.SG)), which were highloghted by baby blue when R2<0.5 or p>0.05.
gene	chromosome	snp	Reference allele	Derived allele	Location	Mongolian_inner	Mongolian_mid	Mongolian_outer	CHB.SG	CHS.SG	adjusted R2	P
EDAR	2	rs3827760	A	G	coding_sequence_variant,missense_variant	1	0.7188	0.6429	0.93689	0.90476	0.5646	0.08868
ADH1A	4	rs975833	G	C	intron_variant	0.5625	0.4375	0.3571	0.7913	0.8476	0.9452	0.003584
ADH1B	4	rs1229984	T	C	coding_sequence_variant,missense_variant	0.5	0.625	0.6538	0.2913	0.2429	0.9011	0.008774
	4	rs3811801	G	A	upstream_transcript_variant	0.5	0.3125	0.2857	0.5922	0.5476	0.8638	0.01431
	4	rs1042026	T	C	3’-UTR	0.625	0.4333	0.3571	0.7913	0.8524	0.9635	0.001935
	4	rs2075633	T	C	intronic	0.625	0.4375	0.3929	0.7913	0.8524	0.9635	0.001935
	4	rs2066701	G	A	intronic	0.625	0.5625	0.3571	0.2087	0.8524	-0.2297	0.6497
	4	rs4147536	A	C	intronic	0.75	0.8438	0.8929	0.93689	0.95238	0.1606	0.5519
	4	rs1229984	T	C	coding_sequence_variant,missense	0.5	0.625	0.6538	0.2913	0.2429	0.9011	0.008774
	4	rs1159918	A	C	upstream_transcript_variant	0.625	0.5	0.5	0.7961	0.8857	0.8465	0.0172
	4	rs6810842	T	G	upstream_transcript_variant	0.625	0.5	0.5	0.801	0.8905	0.8456	0.01735
	4	rs3811801	G	A	upstream_transcript_variant	0.5	0.3125	0.2857	0.5922	0.5476	0.8638	0.01431
	4	rs17033	T	C	3’-UTR	0.125	0.3438	0.4286	0.1359	0.07143	0.8524	0.01618
ADH1C	4	rs698	T	C	coding_sequence_variant,missense_variant,non_coding_transcript_variant	0.1875	0.125	0.1071	0.04854	0.07143	0.08759	0.4707
	4	rs2241894	T	C	coding_sequence_variant,missense_variant,non_coding_transcript_variant	0.9167	0.6154	0.7	0.7379	0.7619	-0.1617	0.5531
ADH7	4	rs1442487	C	T	intronic	0.9375	0.5938	0.6429	0.7816	0.8	0.1446	0.2861
	4	rs729147	G	A	downstream_transcript_variant	0.8125	0.6562	0.6786	0.6699	0.6333	-0.3158	0.8544
	4	rs971074	C	T	coding_sequence_variant,synonymous_variant	0.25	0.3125	0.1429	0.1602	0.1095	-0.1903	0.5905
	4	rs1154469	C	T	intronic	0.125	0.25	0.3571	0.2039	0.2714	0.006039	0.386
ALDH2	12	rs671	G	A	coding_sequence_variant,missense_variant	0.1875	0.0625	0.03571	NA	NA
MCM6	2	rs4988235	G	A	intron_variant	0	0.03125	0.07143	0	0	0.7952	0.02684
	2	rs182549	C	T	intron_variant	0	0.0625	0.07143	0	0	0.7688	0.03241
FADS1	11	rs174537	G	T	intronic	0.375	0.4375	0.4286	0.3544	0.5857
	11	rs174545	C	G	FADS1 3'-UTR	0.375	0.4375	0.4286	0.3544	0.5857
	11	rs174546	C	T	FADS1 3'-UTR	0.375	0.4375	0.4286	0.3544	0.5857
	11	rs174547	T	C	intronic	0.375	0.4375	0.4286	0.3544	0.5857
	11	rs174550	T	C	intronic	0.375	0.4375	0.4286	0.3544	0.5857
	11	rs174556	C	T	FADS1 intronic	0.375	0.4375	0.3571	0.3447	0.5619
TMEM258	11	rs102275	T	C	intergenic	0.375	0.4375	0.4286	0.3544	0.5857
FADS2	11	rs1535	A	G	intronic	0.375	0.4375	0.4286	0.3544	0.5857
	11	rs968567	C	T	intergenic, CpG-island, promoter region	0	0.0625	0	0	0
	11	rs174568	C	T	intergenic	0.375	0.4375	0.4286	0.3544	0.5857
	11	rs174570	C	T	FADS2 intronic	0.375	0.375	0.4286	0.3544	0.5762
	11	rs174575	C	G	intronic	0.1875	0.1562	0.1786	0.09709	0.1381
	11	rs174576	C	A	intronic	0.375	0.4375	0.4286	0.3544	0.5857
	11	rs174577	C	A	intronic	0.375	0.4375	0.4286	0.3544	0.5857
	11	rs174583	C	T	FADS2 intronic	0.375	0.5312	0.4286	0.3592	0.5857
	11	rs174593	T	C	intron	0.1875	0.8125	0.1786	0.09223	0.1381
	11	rs174602	T	C	FADS2 intronic, exon/intron,boundary	0.3125	0.6875	0.2857	0.2573	0.3619
	11	rs2072114	A	G	FADS2 intronic, exon/intron,boundary	0.1875	0.8125	0.25	0.2573	0.4571
	11	rs2845573	A	G	intronic	0.1875	0.8125	0.25	0.2573	0.4476
	11	rs2524299	A	T	intronic	0.1875	0.8125	0.25	0.2573	0.4524
	11	rs2727270	C	T	intronic	0.1875	0.8125	0.25	0.2573	0.4571
FADS3	11	rs1000778	A	G	intronic	0.8125	0.6562	0.75	0.7427	0.7095
	11	rs174450	G	T	intronic, genic_downstream_transcript	0.6875	0.5	0.7143	0.6893	0.6333
MYRF	11	rs174535	T	C	coding_sequence	0.375	0.625	0.4286	0.3544	0.5905
FEN1	11	rs174538	G	A	upstream_transcript	0.375	0.625	0.4286	0.3495	0.5762
MYRF	11	rs108499	C	T	intronic	0.375	0.625	0.4286	0.3495	0.5762
APOA5	11	rs651821	C	T	intronic	0.6875	0.7812	0.6429	0.7427	0.7286
