# Supplementary material for: Genomic Insights Into the Genetic Structure and Natural Selection of Mongolians
Source: Front Genet. 2021 Dec 8;12:735786. doi: 10.3389/fgene.2021.735786 (PMC8693022; doi:10.3389/fgene.2021.735786)
Supplement: Supplementary file 29 [file Table7.xlsx]

## Sheet: A.f4(Mbuti,X;Mongolian,N_North)
Table S7. f4(Mbuti,X;Mongolian,ancient_Mongolia) tested the genetic continuity between ancient_Mongolia and Mongolian_sub, we highlighted non-significant Z score (|Z|<3) in blue.
A. The some extent genetic contribution from Mongolia_N_North to modern Mongolian population.
f4(Mbuti,X;Mongolian_sub,Mongolia_N_North)
	Mongolian_inner	Mongolian_mid	Mongolian_outer
Ami	-4.384	-1.314	1.757
Vietnamese	-4.618	-1.457	1.684
Miao	-3.5	-0.348	2.503
Li	-4.61	-1.78	0.847
Dai	-4.256	-1.42	1.704
Han_NChina	-3.06	0.075	3.116
Han_Fujian	-4.304	-1.145	1.943
Han_Henan	-2.864	-0.02	2.869
Han_Hubei	-4.068	-0.598	2.747
Han_Sichuan	-3.166	-0.139	2.982
Korean	-2.032	1.095	3.516
Japanese	-1.205	1.607	4.168
Daur	1.53	3.295	4.611
Tu	-2.008	0.564	3.211
Dongxiang	-2.067	0.146	2.459
Yugur	-2.373	0.395	2.888
Bonan	-1.68	0.905	3.236
Mongola	-0.565	1.434	3.783
Buryat	5.195	5.698	5.859
Kalmyk.DG	3.454	3.463	3.796
Tibetan_Chamdo	-0.023	2.56	5.102
Tibetan_Xinlong	-1.714	1.342	4.211
Yi	-1.881	1.125	3.89
Qiang_Danba	-1.345	1.548	4.503
Sherpa	-0.294	2.759	4.449
Xibo	-0.349	1.629	3.73
Hezhen	1.202	2.669	4.524
Oroqen	3.9	5.059	5.977
Ulchi	5.741	6.293	6.79
Nganasan	9.216	8.827	8.296
Nanai	5.535	6.128	6.887
Uyghur	-0.017	0.293	0.879
Kazakh_China	2.318	2.791	3.477
Iran_GanjDareh_N	1.203	1.125	-0.257
Iran_C_SehGabi	-0.493	-1.45	-1.697
Turkmenistan_Gonur_BA_1	0.191	-0.879	-1.45
Kazakhstan_Botai.SG	0.34	-0.679	-1.191
Pakistan_IA_Loebanr	1.328	1.099	0.629
Kyrgyzstan_TianShanHun.SG	2.47	1.244	0.87
Japan_Jomon	0.7	2.074	3.475
WSHG	4.259	3.097	2.375
Russia_UstIda_LN.SG	7.491	6.917	7.652
Russia_EBA_Yamnaya_Kalmykia.SG	-0.138	-1.794	-2.47
Russia_Shamanka_Eneolithic.SG	16.552	17.503	17.786
Russia_BA_Okunevo.SG	3.94	2.919	3.017
Russia_Andronovo.SG	-1.314	-3.194	-3.217
Russia_Sintashta_MLBA.SG	-0.03	-1.917	-1.999
Russia_Alan.SG	-1.934	-3.254	-3.518
Boisman_MN	6.95	7.699	8.13
DevilsCave_N.SG	4.097	5.17	6.23
Mongolia_N_East	10.27	11.086	11.751
Mongolia_LBA_4_CenterWest	11.787	12.27	12.492
Mongolia_LBA_3_MongunTaiga	3.165	2.765	3.016
Mongolia_LBA_2_Ulaanzukh	10.635	11.781	12.142
Mongolia_Khovsgol_LBA	12.284	12.516	13.339
Mongolia_EBA_2_Chemurchek	2.413	0.937	0.131
Mongolia_EBA_1_Ulgii	10.919	11.084	11.414
Mongolia_EIA_1_SlabGrave	13.12	13.747	14.712
Mongolia_EIA_4_Sagly	6.921	5.989	6.085
Mongolia_XiongNu.SG	-1.31	1.778	3.617
Mongolia_XiongNu_WE.SG	1.802	1.793	1.72
Mongolia_IA_Xianbei	4.138	4.828	5.203
Mongolia_Medieval	3.219	3.714	4.177
Mongolia_Mongol	3.764	3.976	4.307
Nepal_Mebrak_2125BP.SG	-0.309	1.862	2.93
Nepal_Samdzong_1500BP.SG	0.24	2.579	4.528
Nepal_Chokhopani_2700BP.SG	0.819	2.175	3.446
AR_Xianbei_IA	2.515	2.786	3.146
AR_EN	3.196	3.373	3.989
HMMH_MN	4.038	4.733	5.397
WLR_MN	2.673	3.942	5.164
WLR_BA	0.903	2.198	3.633
WLR_LN	-0.902	1.281	3.513
Bianbian	1.306	3.215	4.041
Boshan	1.526	3.158	4.878
Xiaogao	2.601	3.692	5.522
Xiaojingshan	3.424	4.695	6.685
YR_LN	-2.042	0.604	3.646
YR_MN	-1.465	0.743	3.213
YR_LBIA	-1.6	1.035	3.271
Upper_YR_LN	-0.068	3.01	5.13
Upper_YR_IA	-1.481	1.265	3.46
Shimao_LN	0.347	2.335	4.57
Miaozigou_MN	-0.038	1.572	2.879
Yumin	7.255	8.365	9.689
Nepal_Samdzong_1500BP.SG	0.24	2.579	4.528
Nepal_Chokhopani_2700BP.SG	0.819	2.175	3.446
Taiwan_Gongguan	-2.009	0.445	2.385
Taiwan_Hanben	-1.934	1.366	4.435
Tanshishan	-0.207	0.741	2.379
Xitoucun	-0.078	2	3.642

## Sheet: Bf4(Mbuti,X;Mongolian,Khovsgol)
B. The evident genetic heterogeneity of Mongolia_Khovsgol_LBA and modern Mongolian population.
f4(Mbuti,X;Mongolian_sub,Mongolia_Khovsgol_LBA)
	Mongolian_inner	Mongolian_mid	Mongolian_outer
Ami	-16.62	-14.357	-10.037
Vietnamese	-16.937	-14.557	-10.515
Miao	-17.333	-14.954	-11.311
Li	-16.537	-13.774	-10.181
Dai	-16.61	-14.567	-10.507
Han_NChina	-16.369	-13.642	-10.015
Han_Fujian	-16.98	-14.384	-10.457
Han_Henan	-15.698	-13.248	-9.286
Han_Hubei	-17.412	-14.452	-10.304
Han_Sichuan	-17.276	-14.943	-10.948
Korean	-15.907	-13.318	-9.838
Japanese	-15.923	-13.636	-10.128
Daur	-12.678	-11.372	-9.298
Tu	-14.588	-12.496	-8.915
Dongxiang	-13.103	-10.939	-7.912
Yugur	-15.053	-12.806	-9.66
Bonan	-14.222	-11.683	-8.463
Mongola	-13.25	-11.872	-8.886
Buryat	-6.343	-6.516	-6.023
Kalmyk.DG	-3.319	-3.553	-3.302
Tibetan_Chamdo	-12.978	-10.954	-7.918
Tibetan_Xinlong	-15.264	-12.922	-9.274
Yi	-15.349	-12.744	-9.148
Qiang_Danba	-15.712	-13.469	-9.377
Sherpa	-11.678	-8.911	-6.916
Xibo	-13.281	-11.935	-9.292
Hezhen	-12.242	-11.078	-8.488
Oroqen	-9.837	-9.52	-7.958
Ulchi	-8.841	-8.926	-8.11
Nganasan	-1.638	-2.7	-3.021
Nanai	-9.43	-9.551	-8.129
Uyghur	-2.91	-2.716	-1.89
Kazakh_China	-5.041	-4.874	-3.945
Iran_GanjDareh_N	6.82	7.342	5.429
Iran_C_SehGabi	5.798	5.071	4.605
Turkmenistan_Gonur_BA_1	7.511	6.987	6.104
Kazakhstan_Botai.SG	10.467	10.616	9.759
Pakistan_IA_Loebanr	7.581	8.155	7.091
Kyrgyzstan_TianShanHun.SG	7.454	6.382	5.67
Japan_Jomon	-5.281	-3.987	-2.145
WSHG	13.589	13.464	12.613
Russia_UstIda_LN.SG	4.727	3.979	4.873
Russia_EBA_Yamnaya_Kalmykia.SG	10.292	9.227	8.087
Russia_Shamanka_Eneolithic.SG	1.088	1.645	2.016
Russia_BA_Okunevo.SG	12.238	11.475	11.328
Russia_Andronovo.SG	8.856	7.518	7.15
Russia_Sintashta_MLBA.SG	9.183	7.281	7.124
Russia_Alan.SG	6.638	5.413	5.041
Boisman_MN	-4.912	-4.786	-4.412
DevilsCave_N.SG	-8.367	-7.907	-6.48
Mongolia_N_North	2.965	3.571	4.181
Mongolia_N_East	-0.917	-0.197	0.454
Mongolia_LBA_4_CenterWest	10.278	10.758	10.81
Mongolia_LBA_3_MongunTaiga	6.844	6.622	6.933
Mongolia_LBA_2_Ulaanzukh	1.347	2.299	2.987
Mongolia_EBA_2_Chemurchek	11.38	9.999	9.274
Mongolia_EBA_1_Ulgii	5.69	5.75	6.243
Mongolia_EIA_1_SlabGrave	2.812	3.173	4.1
Mongolia_EIA_4_Sagly	10.493	9.673	9.48
Mongolia_XiongNu.SG	-11.729	-8.787	-6.168
Mongolia_XiongNu_WE.SG	4.83	4.754	4.908
Mongolia_IA_Xianbei	-2.123	-1.442	-0.993
Mongolia_Medieval	-1.573	-1.222	-0.583
Mongolia_Mongol	-0.215	-0.502	0.01
Nepal_Mebrak_2125BP.SG	-8.108	-6.306	-4.987
Nepal_Samdzong_1500BP.SG	-9.975	-7.564	-4.999
Nepal_Chokhopani_2700BP.SG	-7.098	-6.133	-4.283
AR_Xianbei_IA	-3.783	-4.249	-3.549
AR_EN	-2.297	-2.424	-1.573
HMMH_MN	-3.834	-3.711	-2.615
WLR_MN	-7.373	-6.335	-4.747
WLR_BA	-6.854	-6.225	-4.492
WLR_LN	-11.157	-9.854	-6.678
Bianbian	-5.808	-4.077	-2.725
Boshan	-6.38	-4.931	-2.473
Xiaogao	-5.49	-4.559	-1.876
Xiaojingshan	-5.35	-4.092	-1.437
YR_LN	-15.06	-12.362	-8.815
YR_MN	-12.301	-10.371	-7.395
YR_LBIA	-14.185	-11.924	-8.983
Upper_YR_LN	-11.217	-7.907	-5.492
Upper_YR_IA	-11.198	-8.9	-6.365
Shimao_LN	-11.23	-9.23	-6.279
Miaozigou_MN	-8.58	-7.317	-5.681
Yumin	-1.914	-0.558	0.962
Nepal_Samdzong_1500BP.SG	-9.975	-7.564	-4.999
Nepal_Chokhopani_2700BP.SG	-7.098	-6.133	-4.283
Taiwan_Gongguan	-9.566	-7.057	-4.348
Taiwan_Hanben	-13.135	-10.124	-6.138
Tanshishan	-6.549	-5.734	-3.476
Xitoucun	-6.674	-4.563	-2.363

## Sheet: C.f4(Mbuti,X;Mongolian,Sagly)
C. The some extent genetic contribution from Mongolia_EIA_4_Sagly to modern Mongolian population.
f4(Mbuti,X;Mongolian_sub,Mongolia_EIA_4_Sagly)
	Mongolian_inner	Mongolian_mid	Mongolian_outer
Ami	-30.867	-29.992	-27.75
Vietnamese	-32.552	-31.285	-29.463
Miao	-32.662	-31.986	-30.122
Li	-32.323	-31.066	-28.968
Dai	-32.545	-32.226	-30.704
Han_NChina	-32.34	-31.169	-29.662
Han_Fujian	-33.219	-32.126	-30.617
Han_Henan	-31.126	-30.201	-28.177
Han_Hubei	-33.061	-31.335	-29.595
Han_Sichuan	-32.934	-32.099	-30.097
Korean	-33.91	-32.942	-31.495
Japanese	-33.275	-32.605	-30.785
Daur	-29.894	-29.959	-29.265
Tu	-30.629	-29.706	-27.919
Dongxiang	-27.053	-25.856	-23.917
Yugur	-31.206	-30.353	-29.209
Bonan	-28.966	-27.6	-26.295
Mongola	-29.308	-29.125	-28.145
Buryat	-24.176	-25.642	-25.729
Kalmyk.DG	-15.366	-16.764	-17.019
Tibetan_Chamdo	-30.674	-30.167	-29.024
Tibetan_Xinlong	-31.999	-31.86	-29.95
Yi	-32.312	-31.607	-29.755
Qiang_Danba	-32.827	-31.994	-30.169
Sherpa	-27.868	-26.943	-25.973
Xibo	-30.931	-30.798	-30.26
Hezhen	-29.618	-29.352	-28.214
Oroqen	-28.388	-29.428	-28.948
Ulchi	-29.259	-30.547	-31.21
Nganasan	-21.407	-23.608	-24.054
Nanai	-28.71	-30.227	-30.169
Uyghur	-8.835	-9.232	-8.618
Kazakh_China	-17.363	-18.208	-17.791
Iran_GanjDareh_N	15.729	17.145	15.498
Iran_C_SehGabi	17.918	18.439	17.582
Turkmenistan_Gonur_BA_1	15.665	16.281	15.626
Kazakhstan_Botai.SG	9.596	9.672	8.62
Pakistan_IA_Loebanr	15.288	16.543	15.986
Kyrgyzstan_TianShanHun.SG	7.244	6.189	5.888
Japan_Jomon	-14.47	-14.747	-13.406
WSHG	15.36	15.17	14.206
Russia_UstIda_LN.SG	-11.6	-13.356	-12.573
Russia_EBA_Yamnaya_Kalmykia.SG	18.293	17.637	17.396
Russia_Shamanka_Eneolithic.SG	-21.83	-22.85	-23.187
Russia_BA_Okunevo.SG	5.226	4.123	4.322
Russia_Andronovo.SG	19.497	19.179	19.219
Russia_Sintashta_MLBA.SG	19.934	18.703	18.505
Russia_Alan.SG	16.762	16.161	15.641
Boisman_MN	-22.075	-23.061	-23.188
DevilsCave_N.SG	-24.792	-25.701	-24.578
Mongolia_N_North	-19.029	-19.683	-19.807
Mongolia_N_East	-20.437	-20.852	-20.87
Mongolia_LBA_4_CenterWest	-11.184	-11.829	-11.98
Mongolia_LBA_3_MongunTaiga	6.15	5.742	6.26
Mongolia_LBA_2_Ulaanzukh	-19.347	-19.202	-19.091
Mongolia_Khovsgol_LBA	-10.386	-10.844	-10.623
Mongolia_EBA_2_Chemurchek	15.044	13.999	13.727
Mongolia_EBA_1_Ulgii	-9.451	-10.31	-10.323
Mongolia_EIA_1_SlabGrave	-20.814	-21.034	-20.541
Mongolia_XiongNu.SG	-26.36	-24.512	-23.321
Mongolia_XiongNu_WE.SG	0.563	0.489	0.508
Mongolia_IA_Xianbei	-14.516	-14.494	-14.833
Mongolia_Medieval	-9.263	-9.635	-9.115
Mongolia_Mongol	-10.401	-11.48	-11.212
Nepal_Mebrak_2125BP.SG	-18.267	-17.766	-16.925
Nepal_Samdzong_1500BP.SG	-25.214	-24.408	-22.555
Nepal_Chokhopani_2700BP.SG	-20.556	-20.654	-19.335
AR_Xianbei_IA	-12.096	-13.075	-13.145
AR_EN	-12.76	-13.578	-13.213
HMMH_MN	-17.112	-18.908	-17.882
WLR_MN	-25.421	-25.308	-24.588
WLR_BA	-19.623	-20.43	-19.754
WLR_LN	-24.682	-24.736	-21.631
Bianbian	-19.062	-18.382	-17.58
Boshan	-20.866	-20.746	-18.314
Xiaogao	-19.32	-18.909	-17.248
Xiaojingshan	-16.685	-16.479	-14.517
YR_LN	-31.499	-31.077	-29.037
YR_MN	-27.616	-26.567	-25.465
YR_LBIA	-30.764	-28.888	-27.563
Upper_YR_LN	-27.368	-26.41	-24.779
Upper_YR_IA	-26.211	-25.129	-23.652
Shimao_LN	-26.342	-25.728	-23.216
Miaozigou_MN	-14.684	-14.138	-12.986
Yumin	-16.668	-16.264	-15.861
Nepal_Samdzong_1500BP.SG	-25.214	-24.408	-22.555
Nepal_Chokhopani_2700BP.SG	-20.556	-20.654	-19.335
Taiwan_Gongguan	-19.763	-18.755	-16.898
Taiwan_Hanben	-27.293	-26.049	-23.036
Tanshishan	-14.78	-14.956	-12.717
Xitoucun	-16.691	-15.313	-13.544

## Sheet: Df4(Mbuti,X;Mongolian,SlabGrave
D. The some extent genetic contribution from Mongolia_EIA_1_SlabGrave to modern Mongolian population.
f4(Mbuti,X;Mongolian_sub,Mongolia_EIA_1_SlabGrave)
	Mongolian_inner	Mongolian_mid	Mongolian_outer
Ami	-7.017	-3.636	0.416
Vietnamese	-6.865	-3.281	0.947
Miao	-5.441	-1.834	2.045
Li	-6.53	-3.378	0.109
Dai	-6.44	-3.231	0.886
Han_NChina	-4.095	-0.326	3.706
Han_Fujian	-6.031	-2.276	1.943
Han_Henan	-4.652	-1.141	2.742
Han_Hubei	-5.828	-1.73	2.635
Han_Sichuan	-5.713	-2.24	1.911
Korean	-3.898	-0.247	3.01
Japanese	-3.523	-0.199	3.223
Daur	0.66	3.038	4.907
Tu	-3.458	-0.286	3.296
Dongxiang	-2.803	-0.093	2.935
Yugur	-3.899	-0.579	2.685
Bonan	-3.486	-0.262	3.061
Mongola	-1.977	0.504	3.659
Buryat	4.9	5.921	6.209
Kalmyk.DG	2.979	3.265	3.646
Tibetan_Chamdo	-1.517	1.597	4.773
Tibetan_Xinlong	-4.212	-0.581	3.222
Yi	-3.704	-0.101	3.559
Qiang_Danba	-3.145	0.4	4.271
Sherpa	-1.722	2.023	4.076
Xibo	-0.683	1.843	4.738
Hezhen	0.407	2.397	4.88
Oroqen	2.229	3.736	5.006
Ulchi	4.49	5.623	6.389
Nganasan	9.579	9.905	9.288
Nanai	4.233	5.488	6.498
Uyghur	-0.786	-0.472	0.293
Kazakh_China	2.092	2.875	3.801
Iran_GanjDareh_N	0.828	0.697	-1.114
Iran_C_SehGabi	1.617	0.517	0.337
Turkmenistan_Gonur_BA_1	1.774	0.568	-0.205
Kazakhstan_Botai.SG	3.406	2.322	1.556
Pakistan_IA_Loebanr	2.459	2.271	1.543
Kyrgyzstan_TianShanHun.SG	3.675	2.252	1.796
Japan_Jomon	-0.224	1.43	3.299
WSHG	5.016	3.662	2.722
Russia_UstIda_LN.SG	6.993	6.881	7.56
Russia_EBA_Yamnaya_Kalmykia.SG	0.831	-1.214	-1.902
Russia_Shamanka_Eneolithic.SG	10.636	12.178	12.74
Russia_BA_Okunevo.SG	5.9	4.831	4.949
Russia_Andronovo.SG	0.74	-1.287	-1.32
Russia_Sintashta_MLBA.SG	-0.691	-3.328	-3.109
Russia_Alan.SG	-0.914	-2.843	-2.958
Boisman_MN	7.139	8.332	8.882
DevilsCave_N.SG	3.209	4.885	6.173
Mongolia_N_North	14.079	16.128	16.803
Mongolia_N_East	10.872	12.809	13.819
Mongolia_LBA_4_CenterWest	13.873	15.213	15.435
Mongolia_LBA_3_MongunTaiga	4.696	4.313	4.659
Mongolia_LBA_2_Ulaanzukh	12.039	13.971	14.526
Mongolia_Khovsgol_LBA	13.463	14.3	15.047
Mongolia_EBA_2_Chemurchek	4.551	2.554	1.5
Mongolia_EBA_1_Ulgii	11.162	12.018	12.309
Mongolia_EIA_4_Sagly	8.272	7.437	7.353
Mongolia_XiongNu.SG	-1.993	1.874	4.267
Mongolia_XiongNu_WE.SG	2.233	2.451	2.326
Mongolia_IA_Xianbei	5.498	6.583	7.34
Mongolia_Medieval	5.039	5.76	6.883
Mongolia_Mongol	5.172	5.465	6.061
Nepal_Mebrak_2125BP.SG	-2.082	0.324	1.738
Nepal_Samdzong_1500BP.SG	-0.435	2.565	5.165
Nepal_Chokhopani_2700BP.SG	-1.326	0.438	2.253
AR_Xianbei_IA	3.993	4.323	4.947
AR_EN	3.543	3.901	4.437
HMMH_MN	3.237	4.454	5.088
WLR_MN	1.685	3.565	5.163
WLR_BA	0.914	2.447	4.089
WLR_LN	-1.907	0.614	3.52
Bianbian	1.166	3.677	4.822
Boshan	0.88	3.167	5.562
Xiaogao	2.411	3.913	6.492
Xiaojingshan	2.442	4.317	7.052
YR_LN	-2.96	-0.016	3.722
YR_MN	-2.912	-0.087	2.98
YR_LBIA	-2.787	0.608	3.727
Upper_YR_LN	-0.563	3.34	5.938
Upper_YR_IA	-1.658	1.569	4.372
Shimao_LN	-1.316	1.359	4.209
Miaozigou_MN	-0.554	1.596	3
Yumin	8.058	10.103	11.81
Nepal_Samdzong_1500BP.SG	-0.435	2.565	5.165
Nepal_Chokhopani_2700BP.SG	-1.326	0.438	2.253
Taiwan_Gongguan	-3.229	-0.283	2.227
Taiwan_Hanben	-3.369	0.9	5.113
Tanshishan	-1.145	0.048	2.278
Xitoucun	0.193	3.245	5.566

## Sheet: E.f4(Mbuti,X;Mongolian,XiongNu)
E. The obvious genetic continuity between Mongolian_inner and Mongolia_XiongNu and the extent of genetic continuity between Mongolian_mid/Mongolian_outer and Mongolia_XiongNu
f4(Mbuti,X;Mongolian_sub,Mongolia_XiongNu.SG)
	Mongolian_inner	Mongolian_mid	Mongolian_outer
Ami	1.948	4.994	7.312
Vietnamese	1.618	4.618	7.161
Miao	1.428	4.329	6.581
Li	2.64	5.47	7.59
Dai	2.184	4.933	7.233
Han_NChina	1.081	3.912	6.237
Han_Fujian	1.564	4.733	7.277
Han_Henan	1.762	4.55	6.933
Han_Hubei	1.318	4.502	7.05
Han_Sichuan	1.896	4.808	7.189
Korean	0.521	3.387	5.405
Japanese	1.243	3.797	5.924
Daur	-0.136	1.337	2.528
Tu	0.556	2.945	5.107
Dongxiang	1.114	3.253	5.099
Yugur	1.27	3.835	5.851
Bonan	0.583	3.068	5.088
Mongola	0.601	2.363	4.292
Buryat	-0.731	-0.558	-0.333
Kalmyk.DG	-0.151	-0.168	0.041
Tibetan_Chamdo	0.848	3.116	5.131
Tibetan_Xinlong	0.751	3.569	5.886
Yi	0.891	3.634	5.835
Qiang_Danba	0.754	3.435	5.76
Sherpa	0.763	3.482	4.8
Xibo	0.369	2.175	4.012
Hezhen	0.47	1.762	3.337
Oroqen	0.415	1.259	2.093
Ulchi	-0.355	0.001	0.447
Nganasan	-0.279	-0.914	-1.183
Nanai	-0.147	0.254	0.947
Uyghur	-0.488	-0.237	0.278
Kazakh_China	-0.277	0.085	0.721
Iran_GanjDareh_N	-1.861	-2.042	-3.169
Iran_C_SehGabi	-1.977	-2.752	-2.849
Turkmenistan_Gonur_BA_1	-0.542	-1.368	-1.788
Kazakhstan_Botai.SG	-1.114	-2.04	-2.499
Pakistan_IA_Loebanr	-1.688	-1.968	-2.385
Kyrgyzstan_TianShanHun.SG	0.458	-0.75	-0.995
Japan_Jomon	0.279	1.384	2.456
WSHG	0.058	-0.954	-1.493
Russia_UstIda_LN.SG	0.468	-0.233	0.401
Russia_EBA_Yamnaya_Kalmykia.SG	-1.062	-2.552	-3.099
Russia_Shamanka_Eneolithic.SG	1.036	1.417	1.678
Russia_BA_Okunevo.SG	0.441	-0.597	-0.559
Russia_Andronovo.SG	-1.284	-2.712	-2.691
Russia_Sintashta_MLBA.SG	-0.576	-2.32	-2.217
Russia_Alan.SG	-1.15	-2.298	-2.476
Boisman_MN	0.225	0.563	0.761
DevilsCave_N.SG	-0.658	0.135	0.98
Mongolia_N_North	0.49	0.844	1.191
Mongolia_N_East	0.346	0.838	1.258
Mongolia_LBA_4_CenterWest	0.139	0.165	0.297
Mongolia_LBA_3_MongunTaiga	0.549	0.008	0.259
Mongolia_LBA_2_Ulaanzukh	0.26	0.862	1.344
Mongolia_Khovsgol_LBA	0.338	0.267	0.721
Mongolia_EBA_2_Chemurchek	-2.112	-3.607	-4.311
Mongolia_EBA_1_Ulgii	-0.891	-1.105	-0.816
Mongolia_EIA_1_SlabGrave	0.884	1.144	1.812
Mongolia_EIA_4_Sagly	-0.145	-1.177	-1.078
Mongolia_XiongNu_WE.SG	1.226	1.167	1.158
Mongolia_IA_Xianbei	0.712	1.178	1.433
Mongolia_Medieval	-0.507	-0.264	0.187
Mongolia_Mongol	1.38	1.281	1.566
Nepal_Mebrak_2125BP.SG	0.943	2.795	3.521
Nepal_Samdzong_1500BP.SG	-0.308	1.812	3.498
Nepal_Chokhopani_2700BP.SG	2.665	3.86	4.989
AR_Xianbei_IA	0.595	0.535	0.931
AR_EN	-0.198	-0.1	0.365
HMMH_MN	-0.972	-0.556	0.156
WLR_MN	1.661	2.852	3.948
WLR_BA	0.929	1.903	2.997
WLR_LN	1.272	3.133	5.061
Bianbian	1.493	3.096	3.782
Boshan	1.157	2.566	4.077
Xiaogao	1.609	2.499	4.012
Xiaojingshan	0.611	1.674	3.256
YR_LN	2.124	4.489	6.917
YR_MN	1.392	3.467	5.43
YR_LBIA	2.635	5.086	7.029
Upper_YR_LN	1.47	4.342	6.024
Upper_YR_IA	2.618	5.131	6.796
Shimao_LN	1.057	2.941	4.858
Miaozigou_MN	-0.129	1.169	2.058
Yumin	0.056	0.954	1.96
Nepal_Samdzong_1500BP.SG	-0.308	1.812	3.498
Nepal_Chokhopani_2700BP.SG	2.665	3.86	4.989
Taiwan_Gongguan	0.557	2.618	3.962
Taiwan_Hanben	1.637	4.733	7.327
Tanshishan	2.481	3.279	4.631
Xitoucun	2.15	3.904	5.288

## Sheet: F.4(Mbuti,X;Mongolian,Medieval)
F. the obvious genetic continuity between Mongolia_Medieval(Yuan Dynasty) and modern Mongolian population.
f4(Mbuti,X;Mongolian_sub,Mongolia_Medieval)
	Mongolian_inner	Mongolian_mid	Mongolian_outer
Ami	-4.802	-3.18	-1.575
Vietnamese	-4.491	-3.014	-1.361
Miao	-4.092	-2.571	-1.061
Li	-4.551	-3.118	-1.613
Dai	-4.037	-2.634	-1.039
Han_NChina	-4.121	-2.55	-1.095
Han_Fujian	-5.062	-3.675	-1.975
Han_Henan	-3.214	-1.804	-0.332
Han_Hubei	-3.878	-2.213	-0.515
Han_Sichuan	-4.483	-3.063	-1.509
Korean	-4.231	-2.725	-1.481
Japanese	-3.456	-2.135	-0.829
Daur	-1.365	-0.366	0.382
Tu	-2.662	-1.375	-0.078
Dongxiang	-3.143	-2.042	-0.805
Yugur	-3.542	-2.044	-0.798
Bonan	-3.348	-1.915	-0.625
Mongola	-2.083	-0.968	0.137
Buryat	0.807	1.144	1.358
Kalmyk.DG	0.612	0.607	0.922
Tibetan_Chamdo	-3.007	-1.693	-0.407
Tibetan_Xinlong	-3.941	-2.441	-0.968
Yi	-3.439	-2.055	-0.595
Qiang_Danba	-3.698	-2.144	-0.645
Sherpa	-3.257	-1.801	-0.823
Xibo	-2.264	-1.393	-0.289
Hezhen	-1.843	-1.046	-0.051
Oroqen	-1.257	-0.72	-0.22
Ulchi	-0.136	0.21	0.577
Nganasan	1.758	1.546	1.586
Nanai	-0.549	-0.331	0.256
Uyghur	0.421	0.73	1.153
Kazakh_China	0.085	0.662	1.088
Iran_GanjDareh_N	3.042	3.025	2.461
Iran_C_SehGabi	2.066	2.033	1.715
Turkmenistan_Gonur_BA_1	2.811	2.426	2.207
Kazakhstan_Botai.SG	2.694	2.36	2.132
Pakistan_IA_Loebanr	3.2	3.213	3.063
Kyrgyzstan_TianShanHun.SG	2.349	1.993	1.886
Japan_Jomon	-0.871	-0.351	0.427
WSHG	3.131	2.849	2.492
Russia_UstIda_LN.SG	2.154	1.979	2.184
Russia_EBA_Yamnaya_Kalmykia.SG	2.453	1.773	1.553
Russia_Shamanka_Eneolithic.SG	0.545	0.798	1.026
Russia_BA_Okunevo.SG	2.165	2.035	2.021
Russia_Andronovo.SG	3.102	2.588	2.314
Russia_Sintashta_MLBA.SG	4.042	3.658	3.546
Russia_Alan.SG	2.286	2.195	2.215
Boisman_MN	0.277	0.748	0.878
DevilsCave_N.SG	-1.644	-0.994	-0.444
Mongolia_N_North	1.04	1.239	1.671
Mongolia_N_East	1.235	1.343	1.677
Mongolia_LBA_4_CenterWest	2.163	2.348	2.544
Mongolia_LBA_3_MongunTaiga	1.404	1.109	1.606
Mongolia_LBA_2_Ulaanzukh	1.321	1.751	2.308
Mongolia_Khovsgol_LBA	1.252	1.678	1.916
Mongolia_EBA_2_Chemurchek	3.502	3.016	2.534
Mongolia_EBA_1_Ulgii	0.65	0.885	0.998
Mongolia_EIA_1_SlabGrave	1.518	1.81	2.402
Mongolia_EIA_4_Sagly	3.592	3.359	3.527
Mongolia_XiongNu.SG	-3.227	-1.894	-0.851
Mongolia_XiongNu_WE.SG	1.777	1.982	1.868
Mongolia_IA_Xianbei	-0.261	-0.218	0.253
Mongolia_Mongol	1.208	1.083	1.421
Nepal_Mebrak_2125BP.SG	-0.164	0.783	1.396
Nepal_Samdzong_1500BP.SG	-1.481	-0.258	0.783
Nepal_Chokhopani_2700BP.SG	-1.558	-0.532	0.148
AR_Xianbei_IA	-0.586	-0.407	-0.43
AR_EN	-1.652	-1.747	-1.628
HMMH_MN	-0.003	0.14	0.566
WLR_MN	-2.29	-1.621	-0.934
WLR_BA	-1.802	-1.487	-0.647
WLR_LN	-3.065	-1.811	-0.453
Bianbian	-0.756	-0.073	0.562
Boshan	-0.307	0.325	1.388
Xiaogao	-0.37	0.148	1.205
Xiaojingshan	-2.144	-1.447	-0.429
YR_LN	-3.696	-2.284	-0.901
YR_MN	-2.919	-1.621	-0.692
YR_LBIA	-3.896	-2.62	-1.38
Upper_YR_LN	-2.348	-0.956	-0.016
Upper_YR_IA	-3.284	-1.758	-0.604
Shimao_LN	-2.294	-1.174	-0.027
Miaozigou_MN	-0.516	0.301	1.013
Yumin	-0.884	-0.345	0.413
Nepal_Samdzong_1500BP.SG	-1.481	-0.258	0.783
Nepal_Chokhopani_2700BP.SG	-1.558	-0.532	0.148
Taiwan_Gongguan	-2.771	-1.602	-0.482
Taiwan_Hanben	-3.642	-2.106	-0.556
Tanshishan	-1.017	-0.799	0.152
Xitoucun	-1.567	-0.507	0.521
